# Supplementary material
Source: publisher figshare collection journal article supplement (https://acs.figshare.com/ndownloader/files/4516258)
Supplement: Supplementary file 1 [file 4516258]

Supplementary Table 1

| Octane | Chemical Structure | Octane | Chemical Structure |
|--------|--------------------|--------|--------------------|
| 1      |                    | 9      |                    |
| 2      |                    | 10     |                    |
| 3      |                    | 11     |                    |
| 4      |                    | 12     |                    |
| 5      |                    | 13     |                    |
| 6      |                    | 14     |                    |
| 7      |                    | 15     |                    |
| 8      |                    | 16     |                    |

**Supplementary Table 1.** Sixteen structural isomers of octane used in conformational comparisons. Isomers **5**, **12** (and its enantiomer **12\***), and **13** were investigated in detail in this study.
